# Supplementary material for: Comprehensive Synthesis Study of Well-Dispersed and Solution-Processed Metal Nanowires for Transparent Heaters
Source: Hindawi journal article supplement (doi:10.1155/2018/7304807), 2018-01-01
Supplement: f1 [file 7304807.f1.zip]

Archive with 2 entries (2 files):
- 7304807_SupplDesc.docx
- mat.7304807.v2.pdf
