# Supplementary material for: Comprehensive Synthesis Study of Well-Dispersed and Solution-Processed Metal Nanowires for Transparent Heaters
Source: Hindawi journal article supplement (doi:10.1155/2018/7304807), 2018-01-01
Supplement: f1 [file 7304807.f1.zip › 7304807_SupplDesc.docx]

**Figure S-1** Histograms for (left) the length and (right) the diameter distributions for the temperature series shown in Figure 2. In accordance with Figure 2, the histograms are labeled with the corresponding temperature.

**Figure S-2** Histograms for (left) the length and (right) the diameter distributions for the stirring series shown in Figure 3. In accordance with Figure 3, the histograms are labeled with the corresponding stirring parameters.

**Figure S-3** Histograms for (left) the length and (right) the diameter distributions for the PVP: mass ratio series shown in Figure 4. In accordance with Figure 4, the histograms are labeled with the corresponding mass ratios.

**Figure S-4** Histograms for (a) the length and (b) the diameter for a synthesis at a process temperature and time of 110 °C and 12 h, respectively. SEM-images under (c) a low and (d) a high magnification for the low-temperature synthesis.

**Figure S-5** SEM images for syntheses that were conducted with a different average molecular weight for PVP of (a) 10k, (b) 40k and (c) 1.3M. For each synthesis, the weight content for and for PVP was kept constant. (d) mean length of the nanowires as a function of the average molecular weight.

**Figure S-6** SEM images for syntheses that were conducted with a different weight ratio for KCl: of (a) 3 %, (b) 9 % and (c) 15 %. (d) Mean length and mean diameter as a function of the KCl: weight ratio ratio. The inset shows the corresponding aspect ratio as a function of the KCl: weight ratio.

**Figure S-7** Schematic for the four transmittance measurements, i.e. () that are required to determine the haze value. (a-d) indicate for which measurements the reflector and the sample are required.

**Figure S-8** ATR-FTIR measurements for different average molecular weights for PVP of 10k, 40k, 360k and 1.3M. No substrate was utilized to avoid unwanted fingerprints. The PVP was pressed on the ATR-crystal in powder form.

**Figure S-9** SEM-images recorded under (a) high and (b) low magnification for a CuNW-film heater that was subjected to an electrical input power of 6 W until device failure.
