# Supplementary material for: Comprehensive Synthesis Study of Well-Dispersed and Solution-Processed Metal Nanowires for Transparent Heaters
Source: Hindawi journal article supplement (doi:10.1155/2018/7304807), 2018-01-01
Supplement: f1 [file 7304807.f1.zip › mat.7304807.v2.pdf]

Electronic Supplementary Material

## **Comprehensive Synthesis Study of Well-dispersed and Solution-processed Metal Nanowires for Transparent Heaters**

Marco Bobinger <sup>1</sup> (✉), Vasileios Dergianlis<sup>1</sup>, Markus Becherer<sup>1</sup> and Paolo Lugli<sup>2</sup>

<sup>1</sup>Department of Electrical and Computer Engineering, Technical University of Munich, Theresienstr. 90, 80333 Munich, Germany

<sup>2</sup>Faculty of Science and Technology, Free University of Bozen-Bolzano, Universitätsplatz 1, 39100 Bozen-Bolzano, Italy

Received: day month year / Revised: day month year / Accepted: day month year (automatically inserted by the publisher)

Supporting information to DOI 10.1007/s12274-\*\*\*\*-\*\*\*\*-\* (automatically inserted by the publisher)

## Synthesis of Silver Nanowires:

### Histograms

Temperature series:

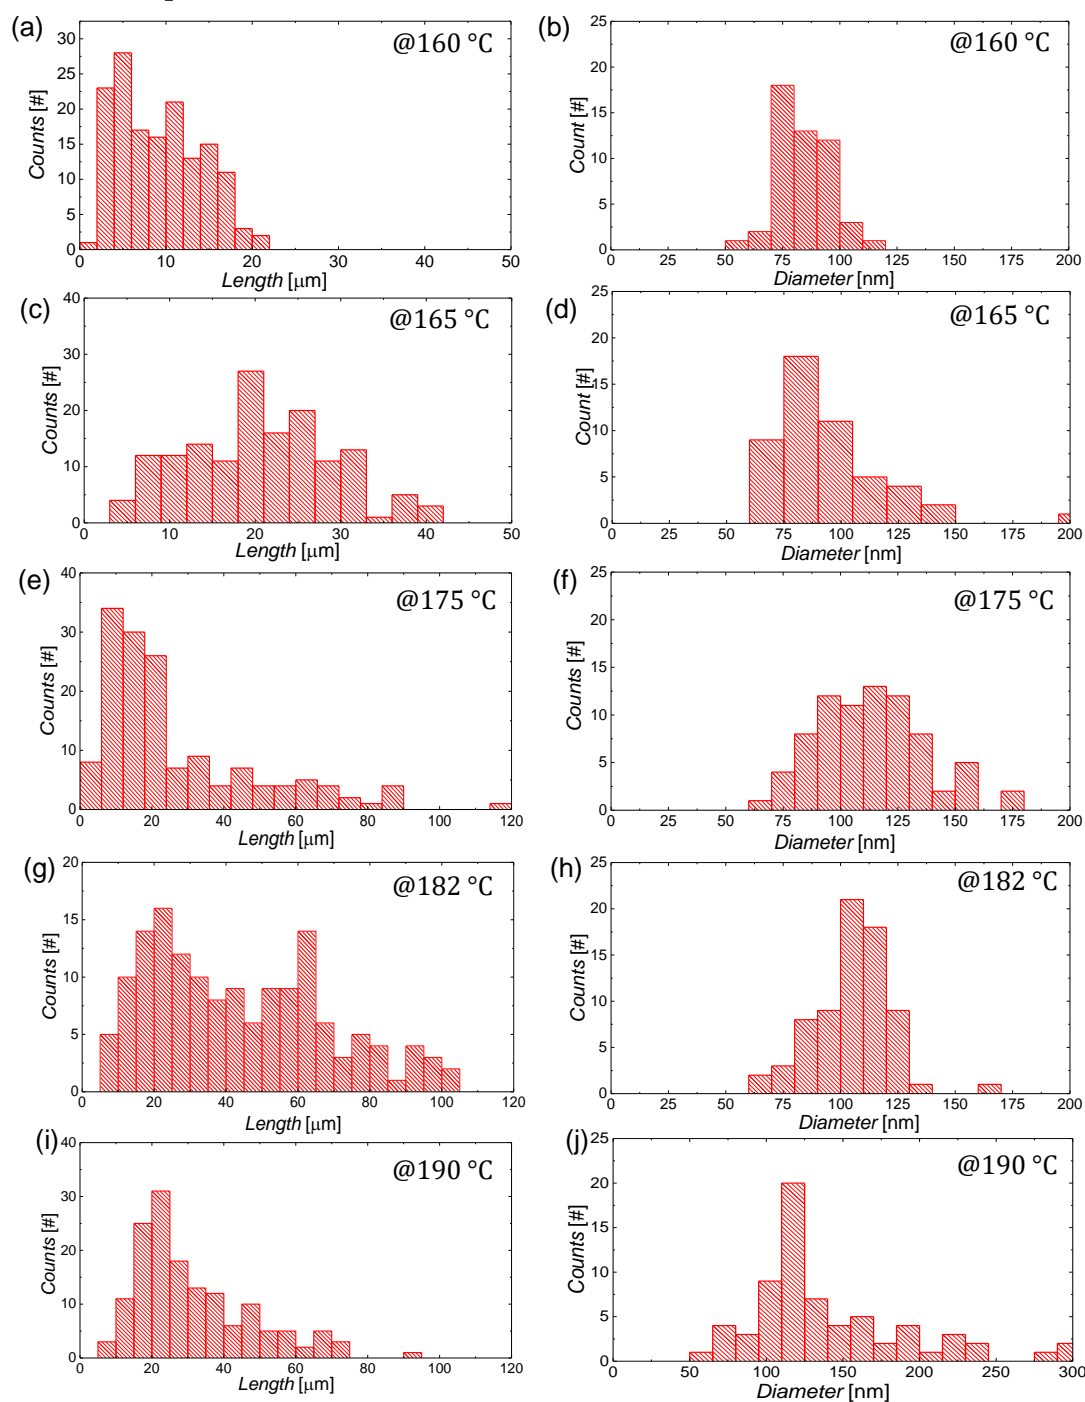

**Figure S-1** Histograms for (left) the length and (right) the diameter distributions for the temperature series shown in Figure 2. In accordance with Figure 2, the histograms are labeled with the corresponding temperature.

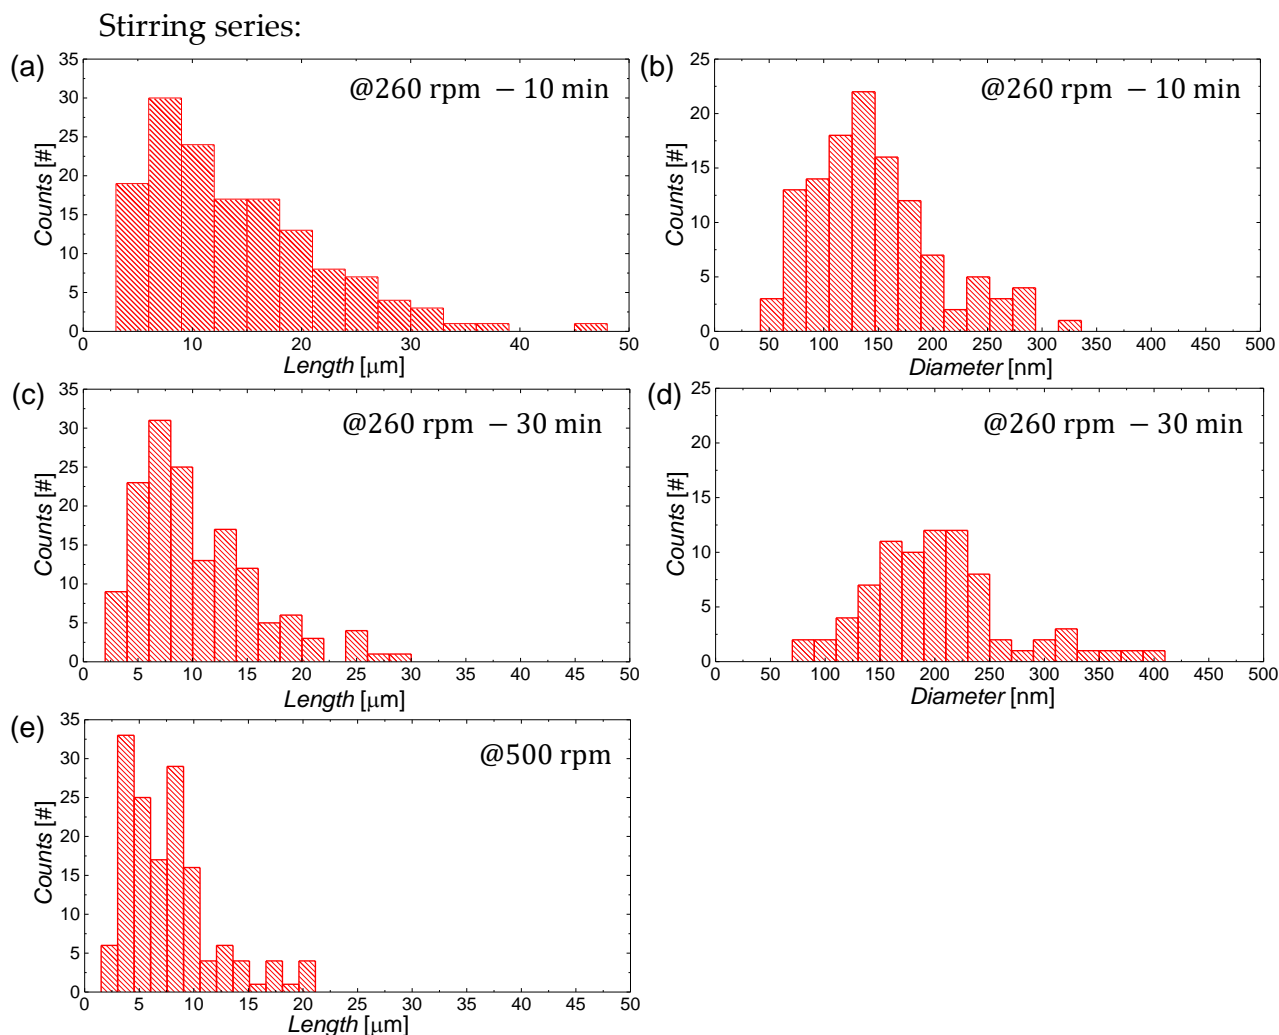

**Figure S-2** Histograms for (left) the length and (right) the diameter distributions for the stirring series shown in Figure 3. In accordance with Figure 3, the histograms are labeled with the corresponding stirring parameters.

PVP: AgNO<sub>3</sub> mass ratio series:

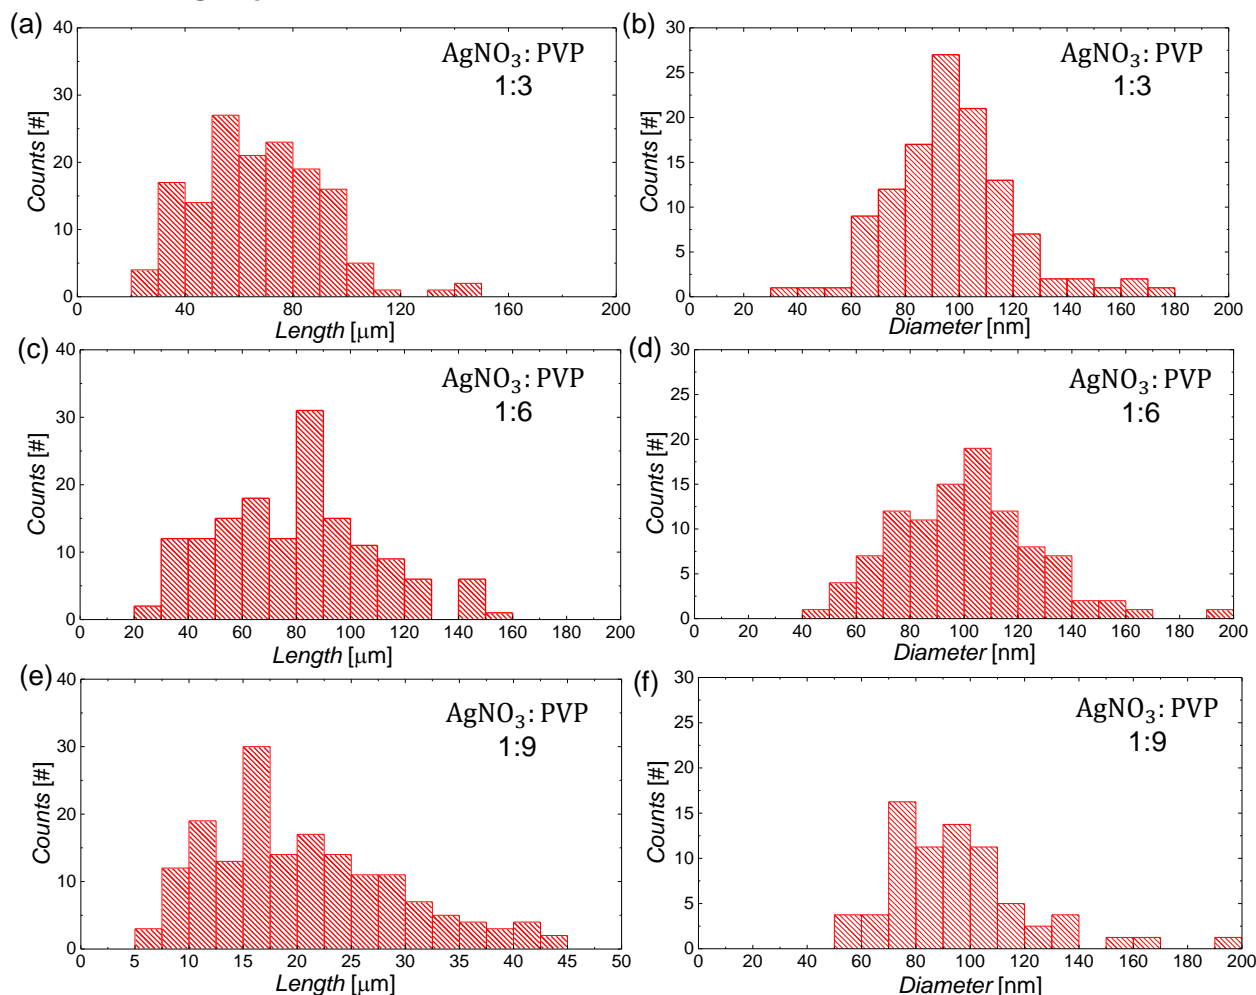

**Figure S-3** Histograms for (left) the length and (right) the diameter distributions for the PVP:AgNO<sub>3</sub> mass ratio series shown in Figure 4. In accordance with Figure 4, the histograms are labeled with the corresponding mass ratios.

Synthesis at 110 °C for 12h:

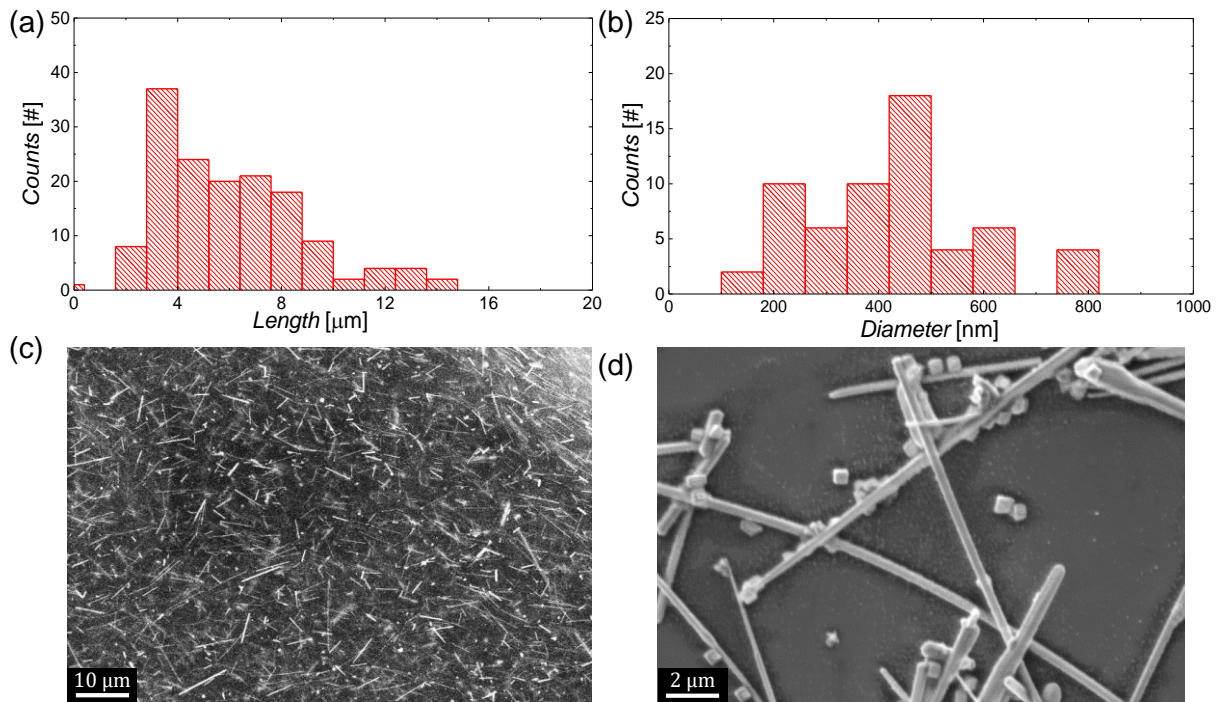

**Figure S-4** Histograms for (a) the length and (b) the diameter for a synthesis at a process temperature and time of 110 °C and 12 h, respectively. SEM-images under (c) a low and (d) a high magnification for the low-temperature synthesis.

PVP different molecular weights series:

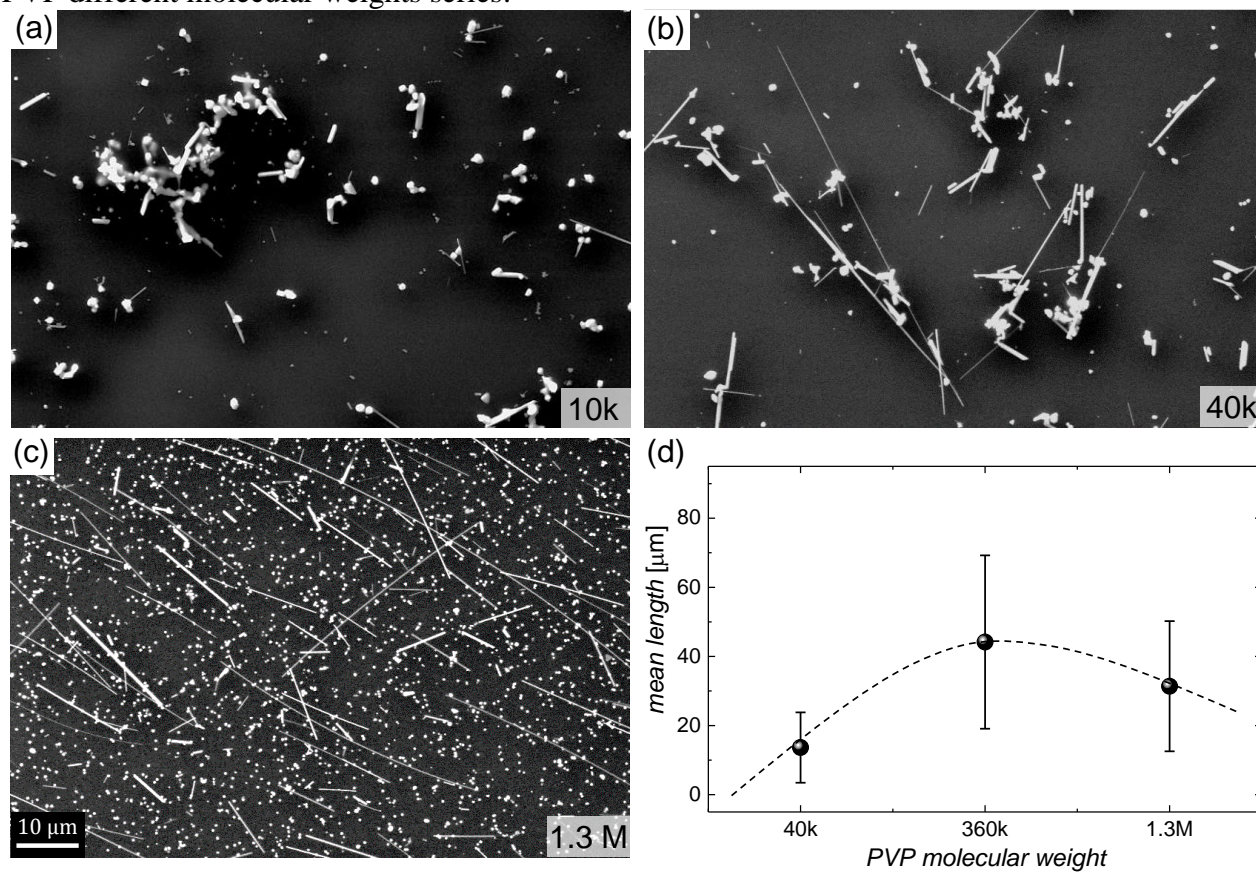

**Figure S-5** SEM images for syntheses that were conducted with a different average molecular weight for PVP of (a) 10k, (b) 40k and (c) 1.3M. For each synthesis, the weight content for  $\text{AgNO}_3$  and for PVP was kept constant. (d) mean length of the nanowires as a function of the average molecular weight.

Halide series using KCl:

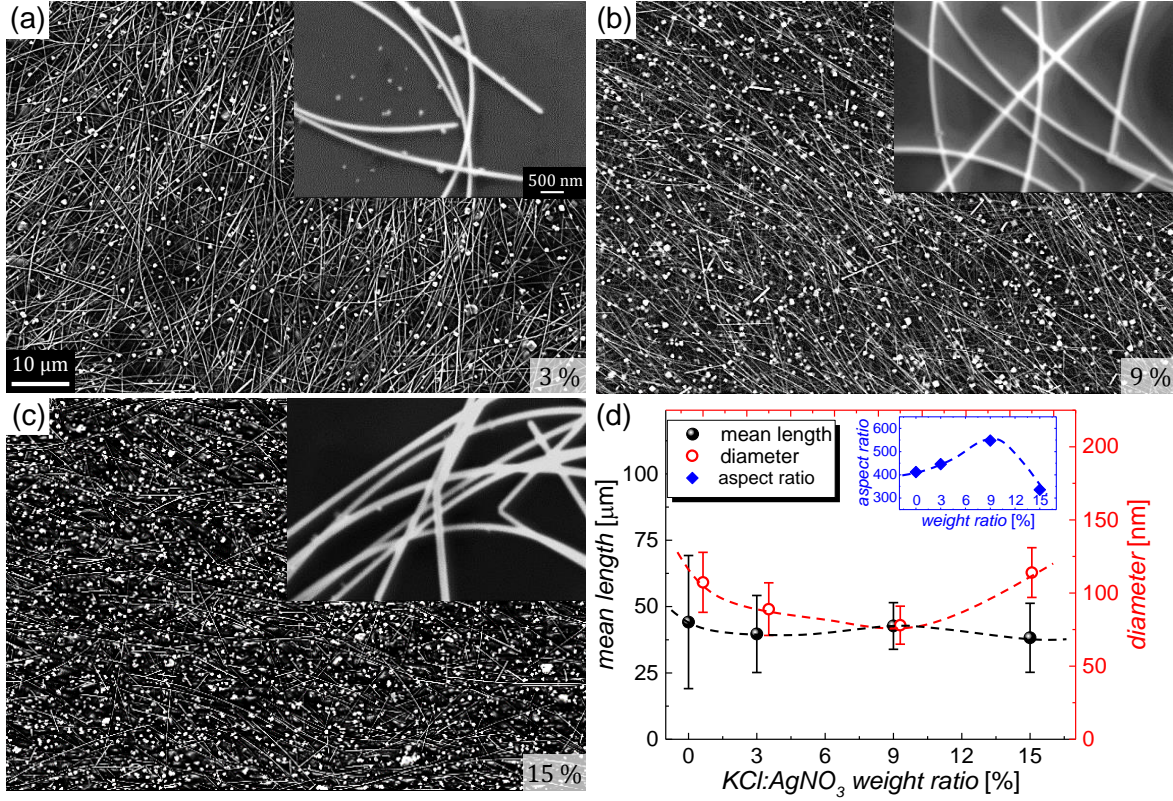

**Figure S-6** SEM images for syntheses that were conducted with a different weight ratio for KCl: AgNO<sub>3</sub> of (a) 3 %, (b) 9 % and (c) 15 %. (d) Mean length and mean diameter as a function of the KCl: AgNO<sub>3</sub> weight ratio ratio. The inset shows the corresponding aspect ratio as a function of the KCl: AgNO<sub>3</sub> weight ratio.

### Haze measurement:

Haze measurements were performed in accordance with the commonly reported ASTM D1003 method using an integrating sphere (IS236A-4) and a silicon photodiode (SM05PD1B) connected to a photodiode amplifier (PDA200C), which were all purchased from Thorlabs. A schematic for the transmittance measurements that are required to calculate the haze value are depicted in Figure S1 (a-d). The haze value is determined in accordance with the definition of the ASTM standard:

$$\text{Haze} = \left( \frac{T_4}{T_2} - \frac{T_3}{T_1} \right) \cdot 100 \% \quad (1)$$

where  $T_1$  denotes the transmittance with a reflector,  $T_3$  denotes the transmittance without the reflector,  $T_2$  denotes the transmittance of the sample and the reflector,  $T_4$  denotes the transmittance of the sample.

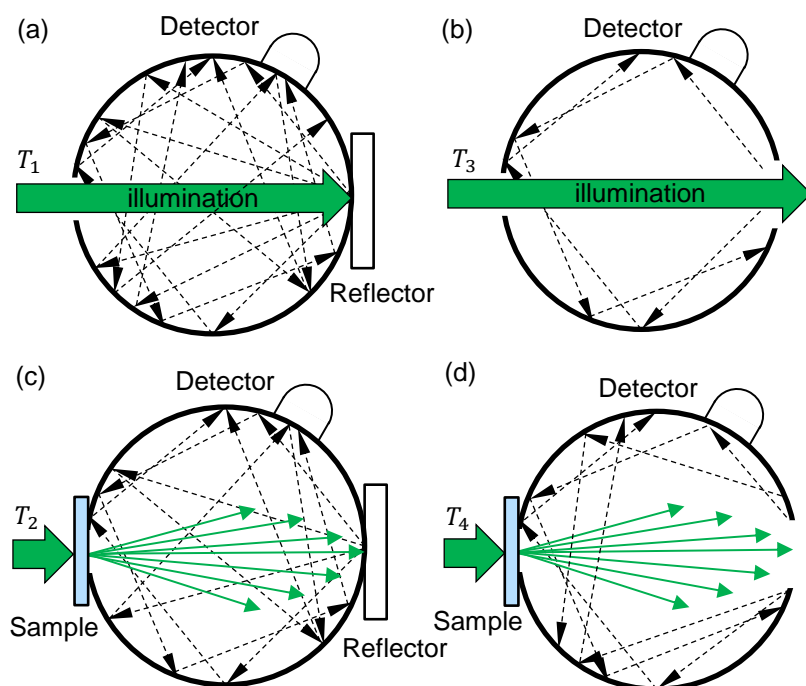

**Figure S-7** Schematic for the four transmittance measurements, i.e. ( $T_1 - T_2$ ) that are required to determine the haze value. (a-d) indicate for which measurements the reflector and the sample are required.

### FTIR measurements for PVP:

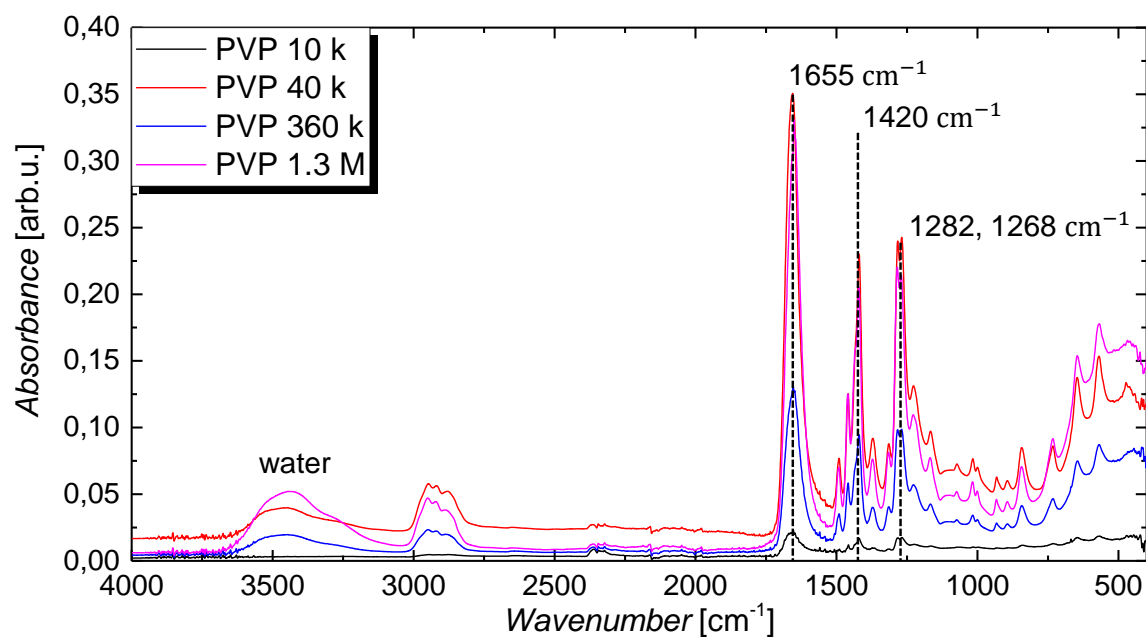

**Figure S-8** ATR-FTIR measurements for different average molecular weights for PVP of 10k, 40k, 360k and 1.3M. No substrate was utilized to avoid unwanted fingerprints. The PVP was pressed on the ATR-crystal in powder form.

### SEM-images for CuNW heaters

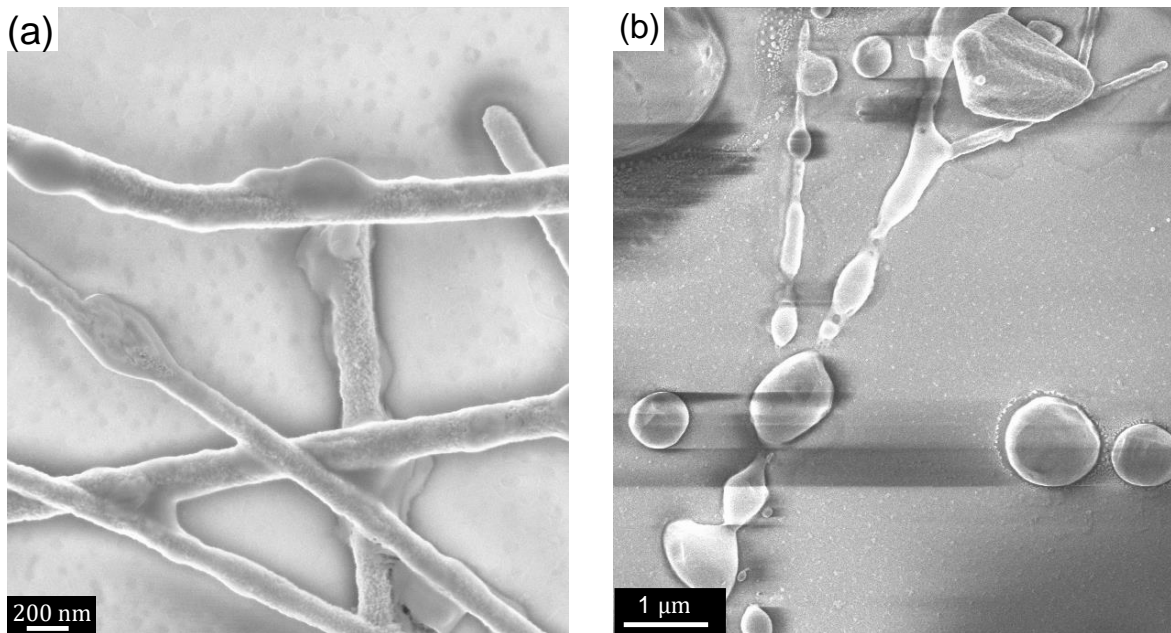

**Figure S-9** SEM-images recorded under (a) high and (b) low magnification for a CuNW-film heater that was subjected to an electrical input power of 6 W until device failure.
